# Supplementary material for: Fast Phase-Contrast Cine MRI for Assessing Intracranial Hemodynamics and Cerebrospinal Fluid Dynamics
Source: MDPI journal article supplement (doi:10.3390/diagnostics10040241), 2020-04-21
Supplement: s1 [file s1]

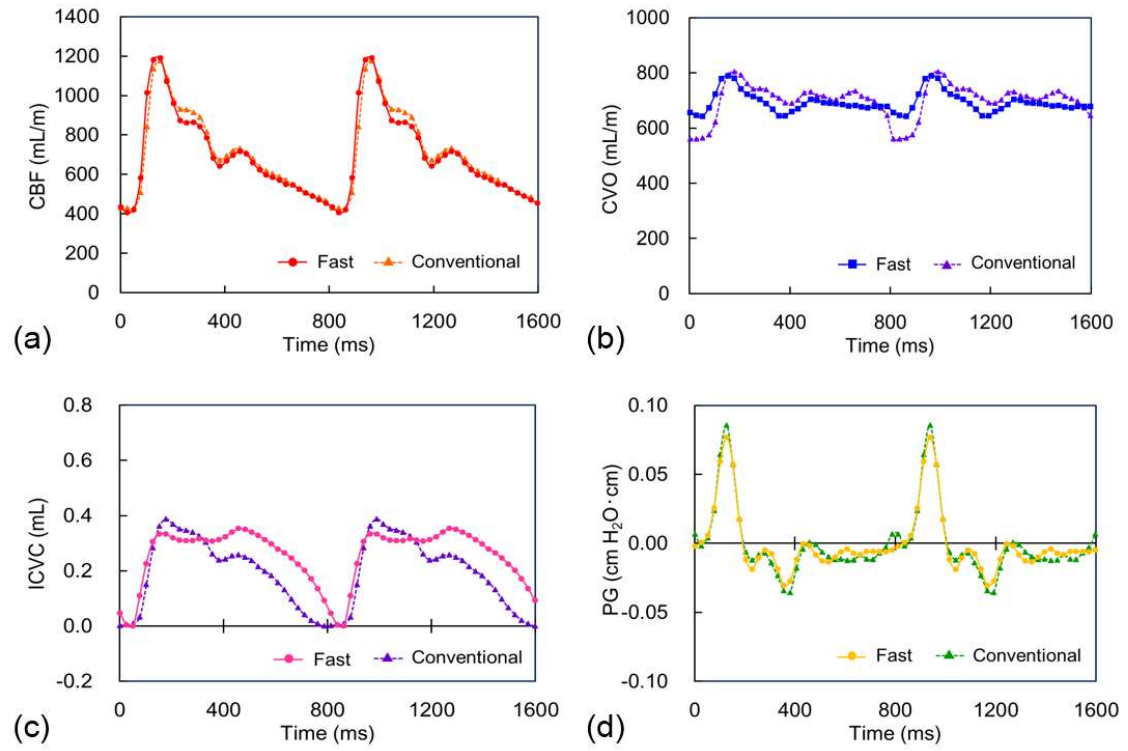

**Figure S1.** Representative waveforms of (a) cerebral blood flow (CBF), (b) cerebral venous outflow (CVO), (c) intracranial volume change (ICVC), and (d) pressure gradient (PG) during the cardiac cycle with the proposed fast and conventional methods are shown for a representative subject.
